# Supplementary material for: Overexpression of TgERF1, a Transcription Factor from Tectona grandis, Increases Tolerance to Drought and Salt Stress in Tobacco
Source: MDPI journal article supplement (doi:10.3390/ijms24044149), 2023-02-19
Supplement: s1 [file s1]

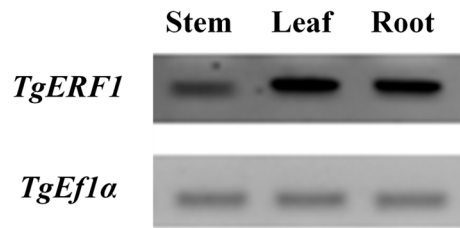

**Figure S1.** Detection of the *TgERF1* transcript in diverse tissues of teak plants. Tissues samples were examined using a semiquantitative RT-PCR characterization. The constitutive *TgEflα* (*Elongation Factor-1 alpha*) housekeeping gene was used as an internal control. *TgERF1*, a ERF transcription factors from *Tectona grandis* confers Salt and Osmotic Stress tolerance to *TgERF1* transgenic tobacco.

**Table S1.** Prediction of the subcellular localization of TgERF1 by WOLF.

| ID          | Site  | Lenght |
|-------------|-------|--------|
| TgERF1      | Nucl. | 166    |
| At2g22310.1 | Nucl. | 365    |
| At5g18450.1 | Nucl. | 307    |
| At4g39910.1 | Nucl. | 371    |
| At2g06330.1 | Nucl. | 555    |
| ORC2_ARATH  | Nucl. | 363    |
| At5g67010.1 | Nucl. | 162    |
| At5g63870.1 | Nucl. | 413    |
| At1g23240.1 | Extr. | 184    |
| ILLA_LEUGL  | Extr. | 137    |
| At5g50470.1 | Nucl. | 212    |
| At3g18485.1 | Cyto. | 386    |
| At4g39780.1 | Nucl. | 272    |
| At1g12360.1 | Cyto. | 666    |
| SBP2_ANTMA  | Nucl. | 171    |

**Table S2.** Transmembrane prediction the TgERF1 protein through the HMMTOP Protein: TgERF1.

Length: 171  
 N-terminus: OUT  
 Number of transmembrane helices: 0  
 Transmembrane helices: 0

Total entropy of the model: 17.0129  
 Entropy of the best path: 17.0129

The best path:

```
seq  LCLRFMKQMK NLTKEEFVHI LRRQSTGFSR GSSKYRGVTL HKCGRWEARM 50
pred 0000000000 0000000000 0000000000 0000000000 0000000000

seq  GQFLGKKAYD KAAIKCNGRE AVTNFEPSNY DREINISSRD GGSGSGLDLN 100
pred 0000000000 0000000000 0000000000 0000000000 0000000000
```

seq
LGISLSSDGP
QGNDTTRNLH
FSHPSGELPD
GKRLKVLLSL
HKMLKLATVF
150

pred
0000000000
0000000000
0000000000
0000000000
0000000000

seq
QLSPFCSSCT
MKFILNFQQA
D
171

pred
0000000000
0000000000
0

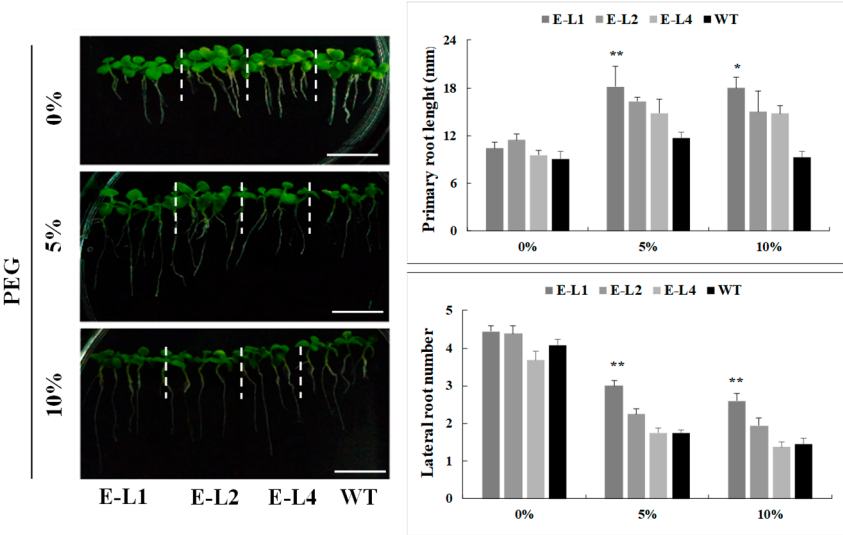

**Figure S2.** Root growth in seedlings of transgenic tobacco overexpressing the *TgERF1* gene and the wild type (WT) control under PEG stress. Three-day-old seedlings were transferred to 0.5% and 10% PEG treatments and grown vertically for seven days. The primary root length and lateral root numbers were recorded at seven days after the transfer. Bar: 1 cm. For each-experiment 48 seedlings/line were used. Bars represent the mean value ± SEM of three independent assays. Significant differences were determined by ANOVA followed by Dunnett's test at  $p < 0.05$  and  $p < 0.01$ .

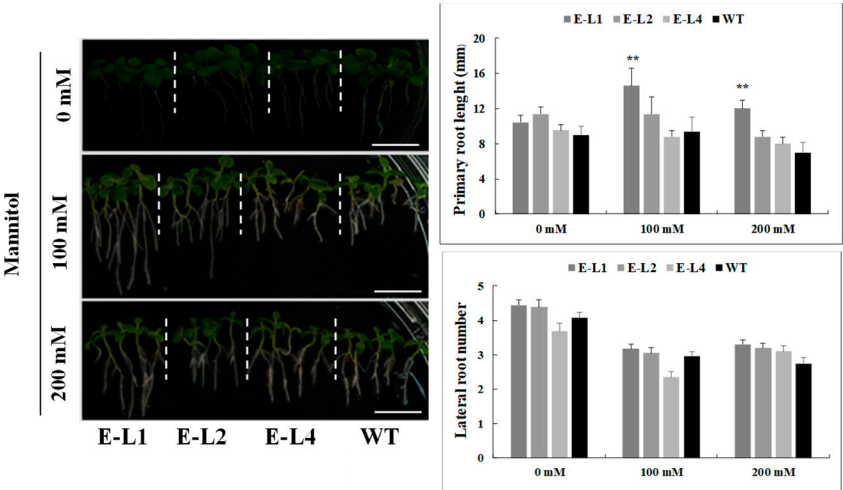

**Figure S3.** Root growth in seedlings of transgenic tobacco overexpressing the *TgERF1* gene and the wild type (WT) control under mannitol stress. Three-day-old seedlings were transferred to 0, 100 and 200 mM mannitol treatments and grown vertically for seven days. The primary root length and lateral root numbers were recorded at seven days after the transfer. Bar: 1 cm. For each-experiment 48 seedlings/line were used. Bars represent the mean value ± SEM of three independent assays. Significant differences were determined by ANOVA followed by Dunnett's test at  $p < 0.05$  and  $p < 0.01$ .

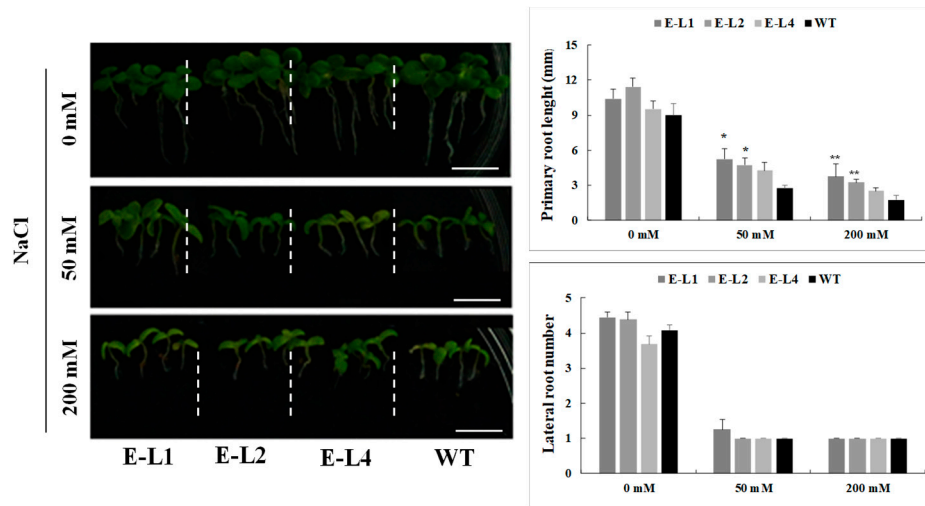

**Figure S4.** Root growth in seedlings of transgenic tobacco overexpressing the *TgERF1* gene and the wild type (WT) control under NaCl stress. Three-day-old seedlings were transferred to 0, 50 and 200 mM NaCl treatments and grown vertically for seven days. The primary root length and lateral root numbers were recorded at seven days after the transfer. Bar: 1 cm. For each-experiment 48 seedlings/line were used. Bars represent the mean value  $\pm$  SEM of three independent assays. Significant differences were determined by ANOVA followed by Dunnett's test at  $p < 0.05$  and  $p < 0.01$ .

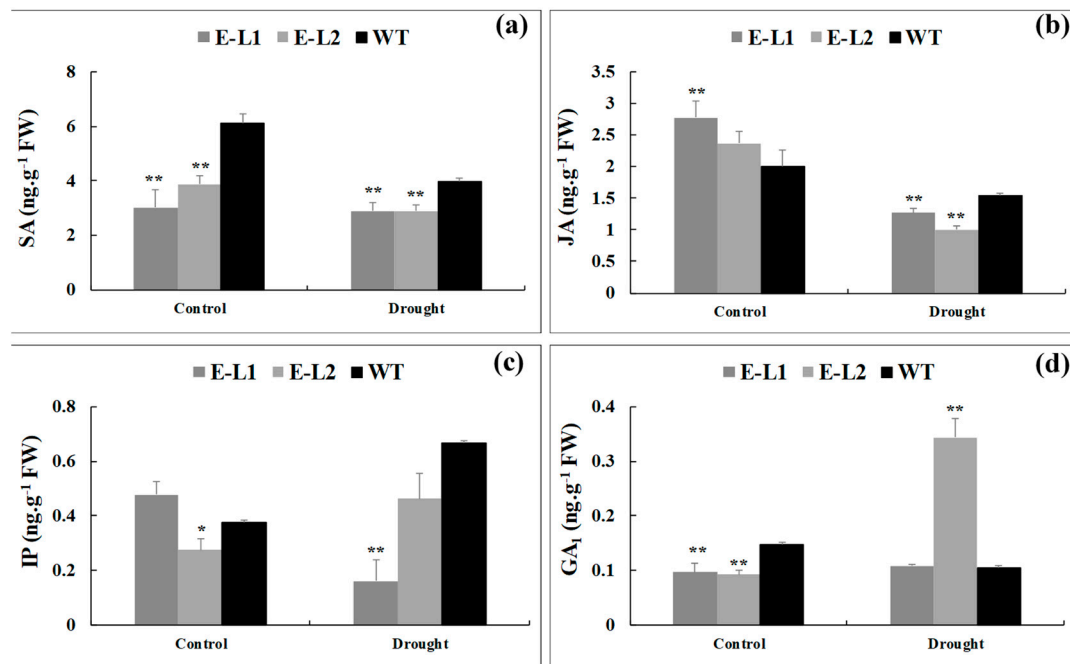

**Figure S5.** Endogenous hormones levels in leaves of *TgERF1* transgenic tobacco and WT control in response to drought stress. Plants were grown in individual pots, watered with one-fifth-strength Hoagland solution and weighed daily. Well-watered control plants were grown in 100% field capacity (0% water loss). The time course drought stress assay started by withholding the nutrient solution until reaching 70% water loss. (a) Salicylic acid; (b) jasmonic acid; (c) 6-dimethylamino purine - iP; (d) gibberellic acid-1. Leaf samples were obtained from plants under well-watered and water-deficit conditions, Primary root length and lateral root numbers were recorded. In each experiment 16 seedlings/line were used. Bars represent mean value  $\pm$  SEM. Significant differences were determined by ANOVA followed by Dunnett's test at  $p < 0.05$  and  $p < 0.01$ .

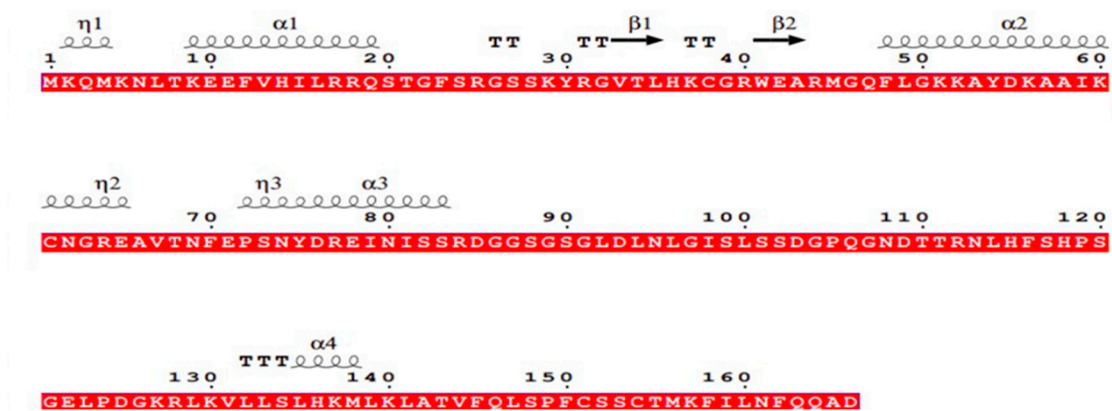

**Figure S6.** TgERF1 Protein sequence and secondary structure. n = loop,  $\alpha$  = Alpha-Helix and  $\beta$  = Beta-Pleated sheets. The secondary prediction was used ESPrint 3.0

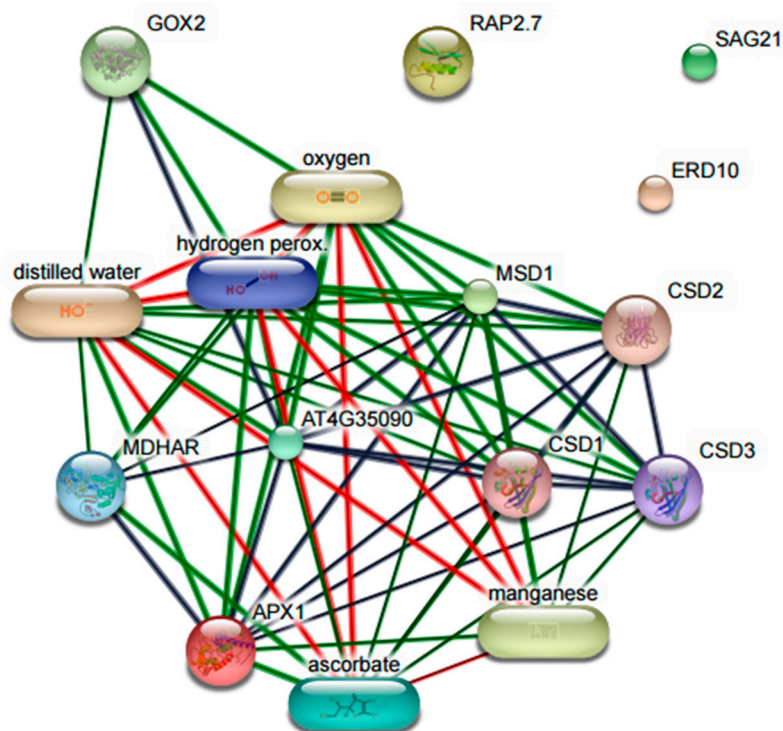

**Figure S7.** Analysis of *TgERF1* gene network generated in Cytoscape and showing association among significantly modulated genes of Figure 13. Arabidopsis orthologous genes were used. Genes showing no association are placed separately from the gene network. Different colored edges with arrows show direction of interactions. *TgERF1* - AT2G28550-RAP2.7 - related to AP2.7, *NtAPX* - APX1 AT1G07890.8, *NtSOD1* - MSD1 AT3G10920.1, *NtCAT* - AT4G35090 - catalase 2, *NtLEA5* - AT1G20450.1 - ERD10 - dehydrin ERD10, *NtERD10C* - AT4G02380.1' *SAG21* - senescence-associated gene 21.

**Table S3.** Primers used in PCR and RT-qPCR analysis of *TgERF1* in *Tectona grandis* under stress

| Gene Name                    | Accession Number | Primer                 | Sequence (5'-3')                              | Amplicon Size (bp) | Reference |
|------------------------------|------------------|------------------------|-----------------------------------------------|--------------------|-----------|
| <i>TgERF1</i>                | MH003850.1       | TgERF1RTF<br>TgERF1RTR | GGAAGAGAAGCCGTCACGAA<br>ATCAAGACCGCTGCCACTAC  | 93                 | This work |
| <i>TgEF1</i><br><i>alpha</i> |                  | TgEF-1AF<br>TgEF-1AR   | CATCAACATTGTGGTCATTGG<br>CCAGACGCCTGTCAATCTTG |                    | [30]      |

**Table S4.** Primers used to amplify the cDNA of *TgERF1* from *Tectona grandis*

| Gene Name     | Accession Number | Primer                   | Sequence (5'-3')                                             | Amplicon Size (bp) | Reference |
|---------------|------------------|--------------------------|--------------------------------------------------------------|--------------------|-----------|
| <i>TgERF1</i> | MH003850.1       | TgERF1CDSF<br>TgERF1CDSR | CACCATGAAACAGATGAAGAATTAAACA<br>GTCTGCTTGCTGAAAATTAAGAATGAAT | 498                | This work |

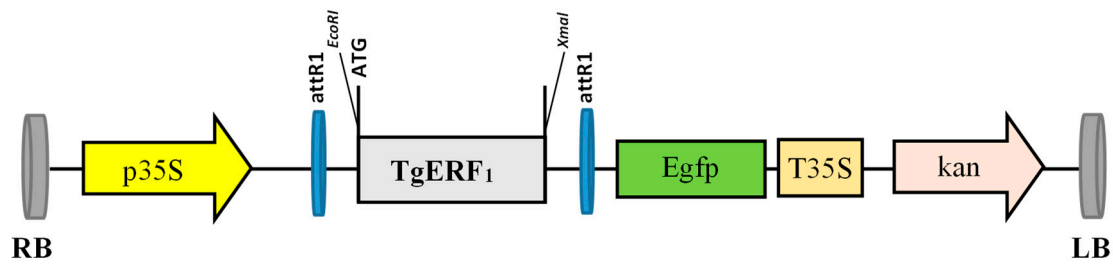

**Figure S8.** Vector used for transformation of tobacco plants. To construct a *TgERF1*- GFP fusion protein, the *TgERF1* coding region without the stop codon was inserted in frame into *EcoRI* and *XmaI* sites of pK7FWG2 upstream *EGFP* coding region. Driven by CAMV35S promoter (p35S), transcription of the fusion gene of *TgERF1* and GFP will be expressed after the construct was transformed into tobacco leaves. The pK7FWG2 contains the selective marker *neomycin phosphotransferase II* (*nptII*) that gives resistance to kanamycin.

**Table S5** Primers used in PCR and RT-qPCR analysis of *TgERF1* overexpression transgenic tobacco (*Nicotiana tabacum*).

| Gene Name                    | Accession Number | Primer                 | Sequence (5'-3')                               | Amplicon Size (bp) | Reference |
|------------------------------|------------------|------------------------|------------------------------------------------|--------------------|-----------|
| <i>35S</i>                   | -                | P35SPCRF               | CGCACAATCCCACTATCCTTC                          | 520                | This work |
| <i>TgERF1</i>                | MH003850.1       | TgERF1RTF<br>TgERF1RTR | GGAAGAGAAGCCGTCACGAA<br>ATCAAGACCGCTGCCACTAC   | 93                 | This work |
| <i>NtEF1</i><br><i>alpha</i> | AF120093         | EF-1AF<br>EF1-AR       | TGAGATGCACCACGAAGCTC<br>CCAACATTGTCACCAGGAAGTG |                    | [77]      |

**Table S6.** Primers used to analyze expression levels of stress responsive genes of *TgERF1* lines

| Gene Name    | Accession Number | Primer           | Sequence (5'-3')                              | Reference |
|--------------|------------------|------------------|-----------------------------------------------|-----------|
| <i>NtAPX</i> | U15933.1         | NtAPXF<br>NtAPXR | GTTTGGGCTTTTCTCCTCGAC<br>GGAGCATAAGAGGAGCGCAA | [84]      |

|                        |            |                        |                                                 |      |
|------------------------|------------|------------------------|-------------------------------------------------|------|
| <b><i>NtCAT1</i></b>   | U93244.1   | NtCAT1F<br>NtCAT1R     | GGCCGCTACAACTCTCTCTTT<br>ACAGGACCTCTTGCACCAAC   | [84] |
| <b><i>NtSOD</i></b>    | AB093097.1 | NtSODF<br>NtSODR       | TCCCCTACGACTATGGAGCA<br>CGGTATGCAATTTGGCGACG    | [84] |
| <b><i>NtERD10C</i></b> | AB049337.1 | NtERD10CF<br>NtERD10CR | GGATTGTCTCCTGCTGCTGT<br>GCTCTTCTAATAAATCAGCACCC | [84] |
| <b><i>NtLEA5</i></b>   | AF053076.1 | LEAF<br>LEAR           | TTGTTAGCAGGCGTGGGTAT<br>CTCTCGCTCTTGTTG GGTTTC  | [85] |

**Table S7.** Full length of the *TgEREF1* gene sequence related with drought stress. *TgEREF1* corresponds to name “comp21250\_c1\_seq6” in the root transcriptome.

comp21250\_c1\_seq6 (2548 pb)

>*TgEREF1*

GGGAATCCCATATCTGGTTCGTCTGTACATACATACATACATATGGACTAATCTGAATATAG  
TCTTCTGTATATTGCATGCATGTATGTGTTGTCTGTAGATTGTGCTTGCTATGGTTAGACAACCTC  
TTTCCTTACATTATGCTGCGATATTTTAATTTCCGCAGTCAACAAATGATTGTTATTTTCCAAAGT  
TTTTCTCAAAATTAGCAGCCTAGTATCAAGAACTTGGAAATATTGTTAGTATTTCTGTGGATG  
TGTTGCTCTATTGGGATTTGTCTGTGGAAGCATGAGTGTTAAATCTGTTTCATGGGCTACTTATTTA  
TTGTTATATGCTCCTTGATAAAATCTGTTTCATGGGCTCTACTTATTTATTGTTATATGCTGCTTGAT  
TAGGTTAATTTGGGTGGCAATTTGTGTACGGTGATCGTCTGAATTTGTGATTTTAGCTGAATCTTG  
GCGTTTTCTTGCAGGGATTGTGGCAAACAAGTCTATTTGGGAGGATTGACACAGCTCATGCTG  
CAGCTAGGGCATATGATCGTGCTGCAATCAAGTTTCGGGGAGTTGATGCTGATATCAATTTCAA  
TATCAGTGATTATGAGGAGGACATGAAACAGATGAAGAATTTAACAAAAGAAGAGTTTGTTC  
CATTCTTCGCCGCCAAAGCACTGGATTCTCTCGGGGAGCTCAAAGTACAGAGGAGTAACCT  
GCACAAATGTGGTCGTTGGGAAGCACGAATGGGCCAATTCCTCGGAAAGAAGGCTTATGATAA  
AGCAGCCATTAAATGCAACGGAAGAGAAGCCGTCACGAACTTTGAGCCTAGTAACTATGACAG  
GGAGATAAATATCAGTTCCAGAGACGGAGGTAGTGGCAGCGGTCTTGATCTCAACCTTGGAAT  
TTCTTTATCTTCAGATGGTCCACAGGGGAATGACACTACCAGGAATTTGCACTTTTCTCATCCGT  
CTGGCGAATTGCCTGATGGGAAGAGATTGAAGGTACTCTTATCCCTTCATAAAATGCTTAAAT  
GGCTACAGTTTTTCAACTCTCCCTTTTTGTTCCTCTTGACTATGAAATTCATTCTTAATTTTCAG  
CAAGCAGACTAGAGGGCTTCACTCCATTGATATATAATTGTTACTGCTGGCATAGAAGCAAATG  
CTACATAAATTTCTTTTCCCTCTTTCTCTTTTACACATATCTCAAGTGGTATAGATGCTATT  
TGTTGGTCTCTCTCTCTGAGAGTATTGAGCTAGGTAGTGCATCCAGACTCAGAAAACCTGATAC  
ACAATTTTCATAGGTGCAACCGACCTCTGCTTCTCTCTCAAGAAATCGTAATGTCAACCAAGTGTC  
CTCCAATGTGGGCTGGCATATATTCTGGTTTTGCCCAAATAGTAAGGTGATTGTTCTTTTCA  
TTTCTATTCAAAACCTTATTACTGCAGCCAAGTTGAGGTCTTGTTAGTACTGTCTTTAGACTTGCA  
ACTTTCCCAAGTTACATGTTTCCTTACCAAATTTGATCATCCCCAGTACCATCTGTATTGTTACT  
TGTGGCTGAATTGCCACCCATTCTTGCTCTCTCGTGTGAGTTATGAATAGAATGGTGCAATGAC  
CTTATGAGAGTCACCTGTGAACTCTTACATAGTTTCAGTTTCTTTGTTTCGTTTTAAGTGTTGTCA  
TCTGCAACCAACTATTGAGTTAGAAGAAAGTCCTTTGCACTTTTTGCTCTTGTTTTCCACTTCGT  
ATTTTTCTGCTTCAGGATGGGGGTGGGAGAAATAGAATTTGATATCAGCAGTTTTCTTGACAC  
ATTCATTGAAGGAGAGAAGCAGATATATCAGAAGAAATGCCAAGTCTGTAATAAAAGATGTGT  
CATTAAGTTTGCAGTTATGGATAACAATTTAATTTTGACTGACAGGAAATAGCAACGAGAATGG  
GCGCTGAAGCTGTTTCCCTGCCTGGATTTTCAAACCTGGCCATGGAAAATGCCAAGCCATGGTGC  
AGTCACCCCTGTGCCACTTTTGTCTTCTTCTGACGATCATCAGGATTCTCTCCGCGACCTCTCC  
ATACTTGAATCCCTCATGTCAATTGACATCTAGAGCGCAATTTCCGGCAACTGCTTTCCGCAGCC  
TTCAGTGAACTTAGCTCCAACAGGAGCAACTGAAACAACATCAGCATTGGGAAAAGCCGCA  
ATTTATTCTGTTCAAGATTGGCTATTAAGAAAAGCCACGCCAATCAGAGATTCATCTCCTCAG  
CAATACATATAATACGAATAACAGATTGACTCAGTCATATGATGTCTCGATTGGTACAATGCTC  
ATTAGAATTTTGGAGTCTCAATATTGTGTAGATTCTGATTTGGCAAAGTAAATGGATTGCTGTT  
ATAATCTGTCTGAATTCCAGTGTGAATCTTTAGCTAGATAAGAAATGCAACAAAAAGAAGTA  
AAACCGTGGAATCTCGGGTACGCTTTAGGTGCCGGGCACATAAATTTGCGTGATTGAGAAGCA  
TTTGACCTTTTCGTTTACATATCAATTT
